# Supplementary material for: Adsorption of gas molecules (NH3, C2H6O, C3H6O, CO, H2S) on a noble metal (Ag, Au, Pt, Pd, Ru)-doped MoSe2 monolayer: a first-principles study
Source: Royal Society of Chemistry journal article supplement (doi:10.1039/d1nj01705e), 2021-01-01
Supplement: d1nj01705e1.pdf [file d1nj01705e1.pdf]

## Supporting Information

### **Adsorption of the Gas Molecules ( $\text{NH}_3$ , $\text{C}_2\text{H}_6\text{O}$ , $\text{C}_3\text{H}_6\text{O}$ , $\text{CO}$ , $\text{H}_2\text{S}$ ) on noble metal (Ag, Au, Pt, Pd, Ru)–Doped $\text{MoSe}_2$ Monolayer: A First-Principles Study**

Lanjuan Zhou, Sujing Yu, Yan Yang, Qi Li, Tingting Li\*, Dongzhi  
Zhang\*

College of Control Science and Engineering, China University of Petroleum (East  
China), Qingdao 266580, China

\*Corresponding authors: Dongzhi Zhang

E-mail address: dzzhang@upc.edu.cn

Tel: +86-532-86982928

Fax: +86-532-86983326

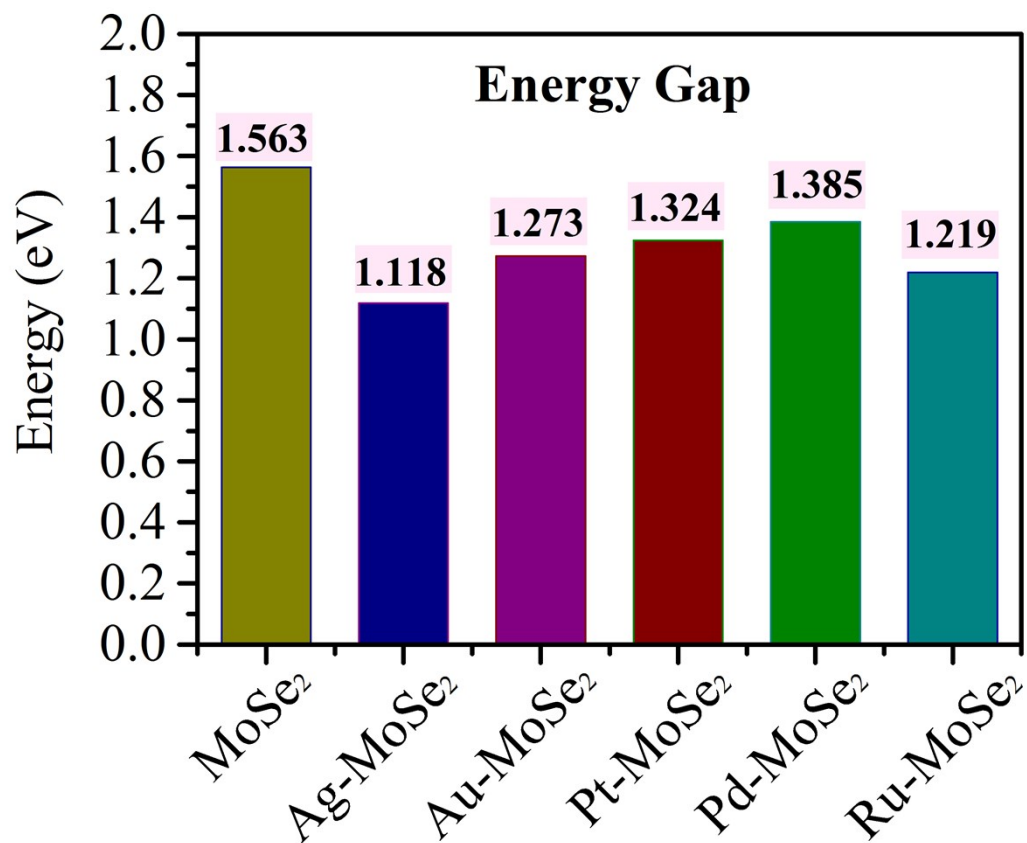

**Figure S1.** Energy gap of pristine monolayer MoSe<sub>2</sub> and metal (Ag,

Au, Pt, Pd and Ru)-doped monolayer MoSe<sub>2</sub>.
